# Supplementary material for: Hydrophobic conjugated microporous polymer as a novel adsorbent for removal of volatile organic compounds
Source: Royal Society of Chemistry journal article supplement (doi:10.1039/c4ta02605e), 2014-01-01
Supplement: c4ta02605e1.pdf [file c4ta02605e1.pdf]

## Supporting information

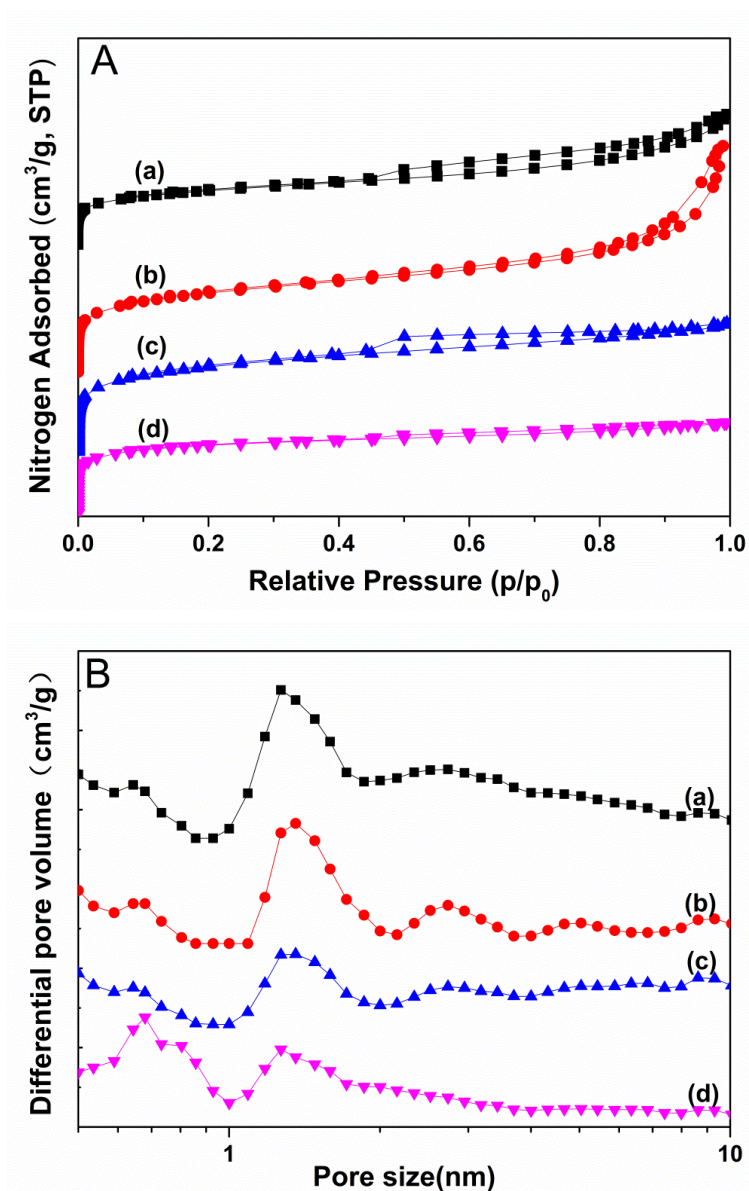

**Figure S1.** Nitrogen adsorption-desorption isotherms (A) and DFT pore size distributions (B) of CMP-50 (a), CMP-250 (b), CMP-500 (c) and AC (d)

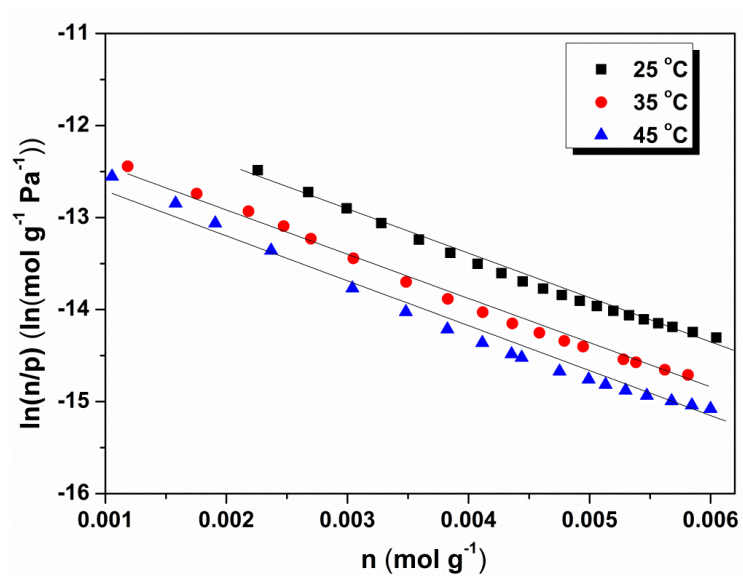

**Figure S2.** Virial graphs for benzene on CMP-50 at different temperatures.

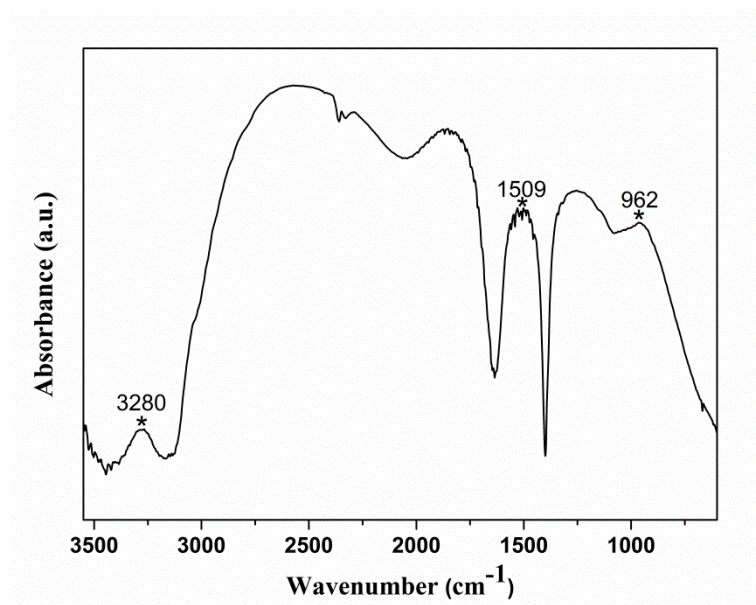

**Figure S3.** FT-IR spectra of pattern for AC
